# Supplementary material for: Controllable fabrication of metallic photonic crystals for ultra-sensitive SERS and photodetectors
Source: Royal Society of Chemistry journal article supplement (doi:10.1039/c7ra11721c), 2017-01-01
Supplement: c7ra11721c1.pdf [file c7ra11721c1.pdf]

## Supporting Information

### **Controllable Fabrication of Metallic Photonic Crystals for Ultra-Sensitive SERS and Photodetector**

*Zihe Cai, Yang Yan, Lin Liu, Shengxuan, Lin and Xiaobin Hu\**

*State Key Laboratory of Metal Matrix Composites, Shanghai JiaoTong University, Shanghai 200240, People's Republic of China*

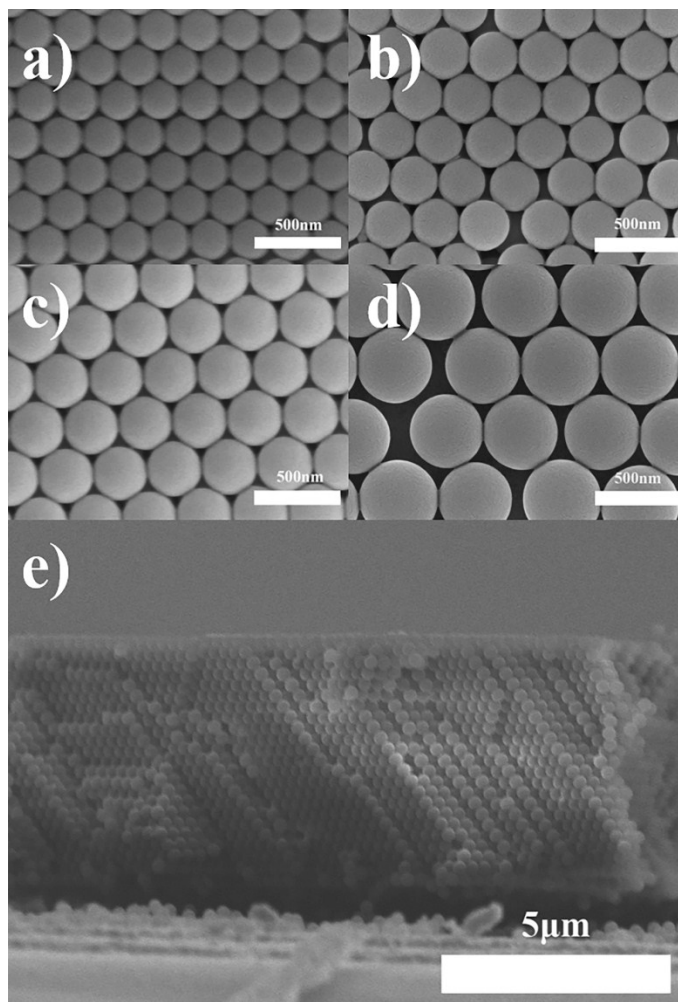

**Figure S1.** (a-e) SEM images of fabricated PS colloidal crystals templates on FTO glass slides after self-assembly, (a) 200 nm; (b) 300 nm; (c) 370 nm; (d) 450 nm; (e) top-view SEM image of PS template with diameter of 300nm.

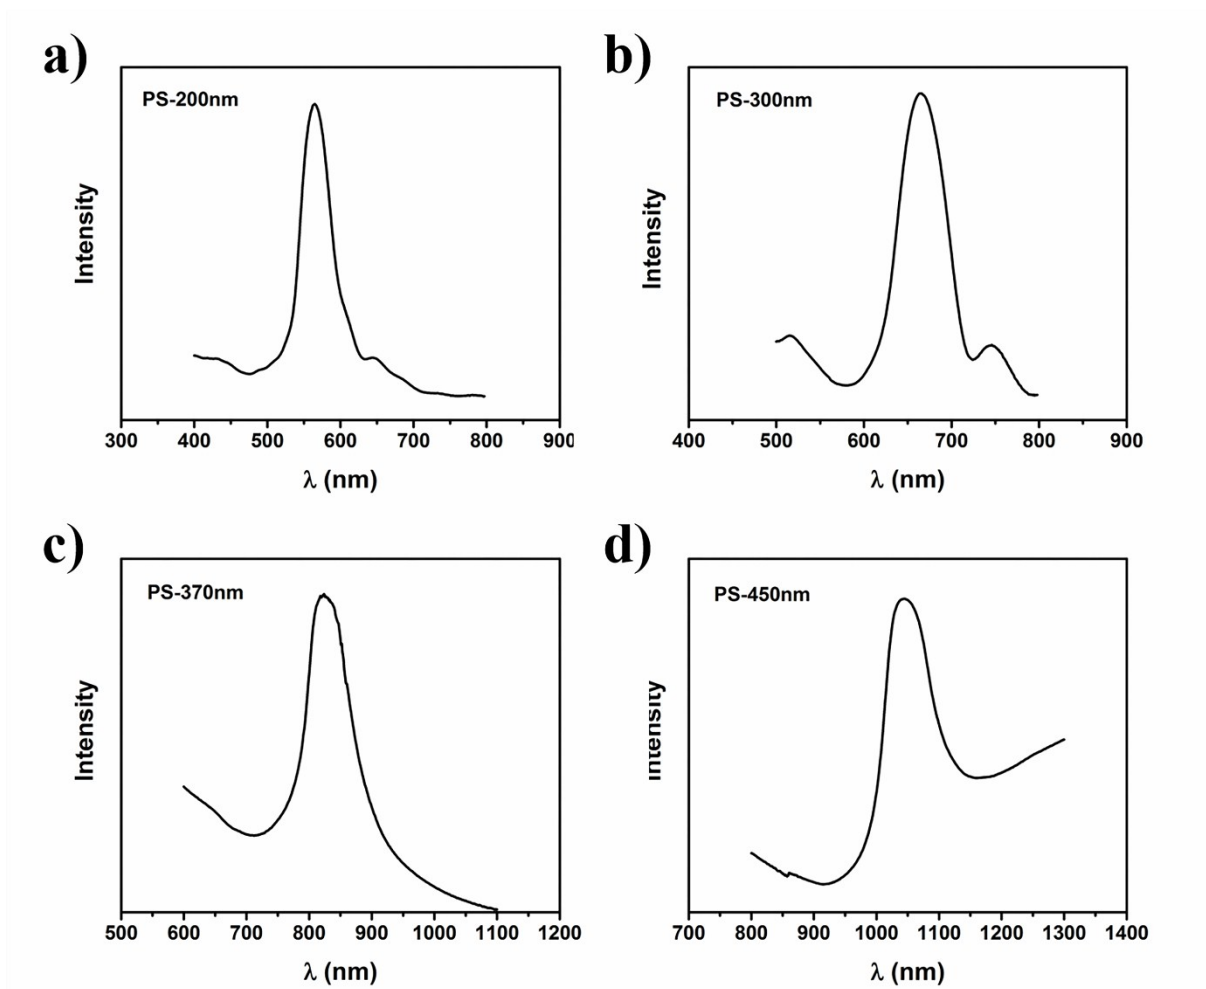

**Figure S2.** (a-d) Reflection spectra of PS colloidal crystals templates on FTO glass slides, (a) 200 nm; (b) 300 nm; (c) 370 nm; (d) 450 nm.

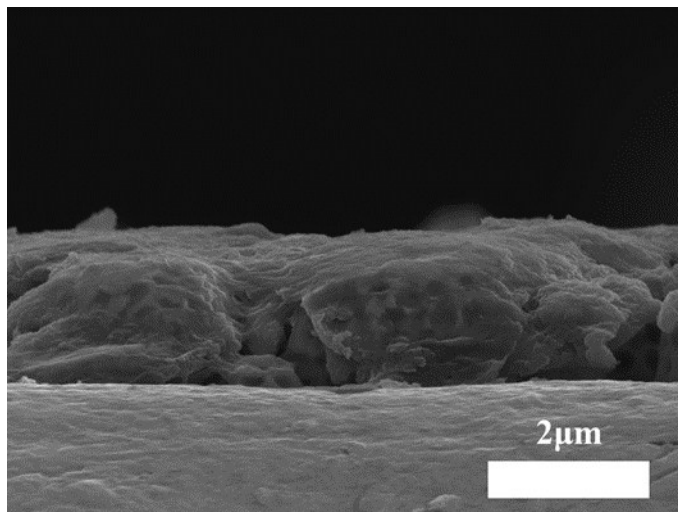

**Figure S3.** Cross-sectional view SEM image of Ag MPCs with diameter of 370nm.

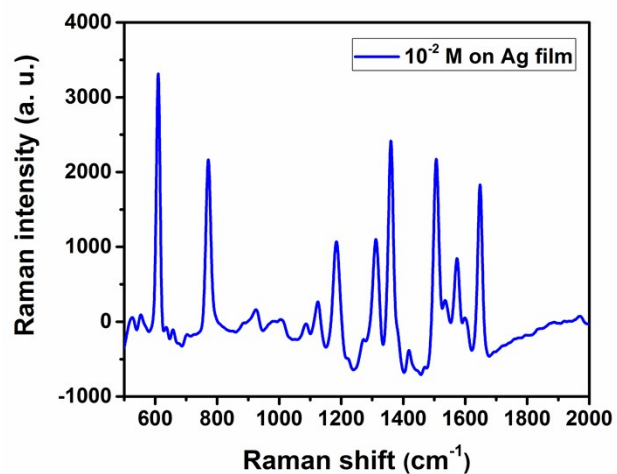

**Figure S4.** Raman spectrum of  $10^{-2}$  M R6G collected from a normal Ag film substrate on FTO glass slides.

**Table S1.** A comparison between Metallic Inverse opal and recently reported noble-metal nanostructures in terms of the SERS enhancement factor of R6G.

| Current results                            | Structure                            | EF                 |
|--------------------------------------------|--------------------------------------|--------------------|
| This work                                  | Metallic Inverse Opal                | $4.8 \times 10^9$  |
| ACS Nano, 2011 <sup>1</sup>                | Metallo-Dielectric Photonic Crystals | $0.76 \times 10^8$ |
| ACS Nano, 2017 <sup>2</sup>                | Au-Functionalized Si Nanorod Arrays  | $3.3 \times 10^7$  |
| ACS. Appl. Mater. Inter, 2012 <sup>3</sup> | Au/SiO <sub>2</sub> Nanocomposites   | $5.4 \times 10^8$  |
| Chem. Commun., 2011 <sup>4</sup>           | Gold Nanoparticles                   | $5.8 \times 10^7$  |

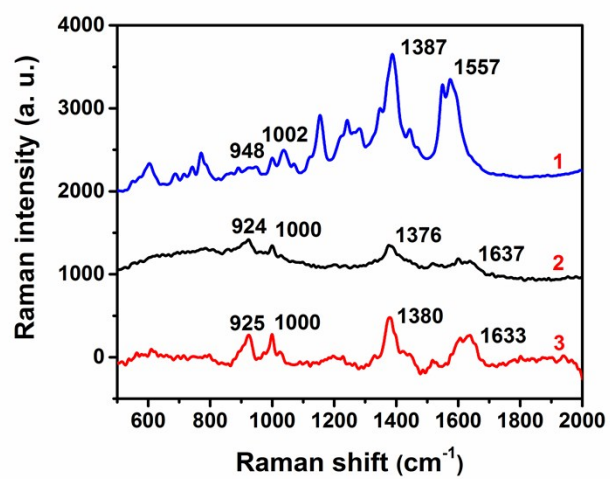

**Figure S5.** Raman spectra of  $10^{-13}$  M R6G collected from one Ag-200nm sample where three different positions were chosen randomly for measurement.

**Table S2.** Detailed electrodeposition solutions and corresponding reaction conditions.

| Materials | Deposition solutions                                                                                                                                    | <i>t</i> (min) | <i>T</i> (°C) | Potential (V) or current density (mA/cm <sup>2</sup> ) |
|-----------|---------------------------------------------------------------------------------------------------------------------------------------------------------|----------------|---------------|--------------------------------------------------------|
| Ag        | Silver nitrate (1.7g),<br>EDTA (3.7g),<br>boric acid (0.06g),<br>potassium nitrate (1g),<br>ammonium hydroxide,<br>PH=9~10,<br>deionized water (100ml)  | 5min           | 25°C          | 2.5 mA/cm <sup>2</sup>                                 |
| Cu        | Copper sulfate (4g),<br>trisodium citrate (4.7g),<br>glucose (0.36g),<br>SDS (0.02g),<br>4mol/L, sodium hydroxide<br>(0.5g),<br>deionized water (100ml) | 5min           | 25°C          | 3.5 mA/cm <sup>2</sup>                                 |
| Ni        | Nickel sulfate (30g),<br>nickel chloride (4.5g),<br>boric acid (4g),<br>glucose (1g),<br>SDS (0.02g),<br>deionized water (100ml)                        | 10min          | 25°C          | -0.90V                                                 |
| Co        | Cobalt sulfate (30g),<br>cobalt chloride (4.5g),<br>boric acid (4g),<br>glucose (1g),<br>SDS (0.02g),<br>deionized water (100ml)                        | 10min          | 25°C          | -0.95V                                                 |

## Reference

- 1 Y. Zhao, X.-J. Zhang, J. Ye, L.-M. Chen, S.-P. Lau, W.-J. Zhang and S.-T. Lee, *ACS nano*, 2011, **5**, 3027-3033.
- 2 D. Lin, Z. Wu, S. Li, W. Zhao, C. Ma, J. Wang, Z. Jiang, Z. Zhong, Y. Zheng and X. Yang, *ACS nano*, 2017, **11**, 1478-1487.
- 3 C. C. Chang, K. H. Yang, Y. C. Liu, T. C. Hsu and F. D. Mai, *ACS Appl. Mater. Inter.*, 2012, **4**, 4700-4707.
- 4 F. D. Mai, T. C. Hsu, Y. C. Liu, K. H. Yang and B. C. Chen, *Chem. Commun.*, 2011, **47**, 2958-2960.
